# Supplementary figures and images for: A cross-sectional analysis of treatment patterns in small-cell lung cancer in five European countries
Source: PubMed Central journal article supplement — Future Oncol. 2023 Nov 30;20(17):1151–64. doi: 10.2217/fon-2022-1315 (PMC11318697; doi:10.2217/fon-2022-1315), 2023-11-30

Start of data  
availability  
Q1 2018

End of  
available data  
Q4 2021

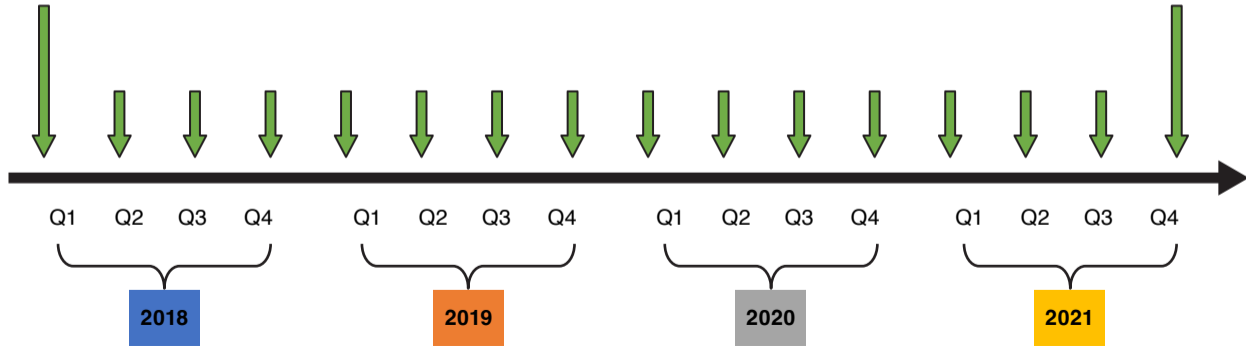

Supplement: IFON_A_2337540_SM0001.pdf [file IFON_A_2337540_SM0001.pdf]
